# Supplementary material
Source: MDPI journal article supplement (https://www.mdpi.com/2071-1050/12/5/1868)
Supplement: s1 [file s1]

Supplementary material

**Trace elements in soils of a typical industrial district in Ningxia, Northwest China:  
pollution, source, and risk evaluation**

**Songlin Zhang <sup>1</sup>, Yuan Liu <sup>1</sup>, Yujing Yang <sup>2</sup>, Xilu Ni <sup>3</sup>, Muhammad Arif <sup>1</sup>, Wokadala Charles <sup>1</sup> and Changxiao Li <sup>1,\*</sup>**

<sup>1</sup> Key Laboratory of Eco-environments in Three Gorges Reservoir Region (Ministry of Education), Chongqing Key Laboratory of Plant Ecology and Resources Research in Three Gorges Reservoir Region, School of Life Sciences, Southwest University, Chongqing, 400715, China; slzhang@email.swu.edu.cn (S.Z.); liuyuan20100901@163.com (Y.L.); muhammadarif@swu.edu.cn (M.A.); walkerdarlercharles@yahoo.com (W.C.); lichangx@swu.edu.cn (C.L.)

<sup>2</sup> Faculty of Resources and Environmental Sciences, Hubei University, Wuhan, 430062, China; yyjzh158@hubu.edu.cn (Y.Y.)

<sup>3</sup> Breeding Base for State Key Laboratory of Land Degradation and Ecological Restoration of North-western China, Key Lab for Restoration and Reconstruction of Degraded Ecosystem in North-western China (Ministry of Education), Ningxia University, Yinchuan, 750000, China; nixilu110@163.com (X.N.)

\* Correspondence: lichangx@swu.edu.cn; Tel.: +86-23-6825-2365

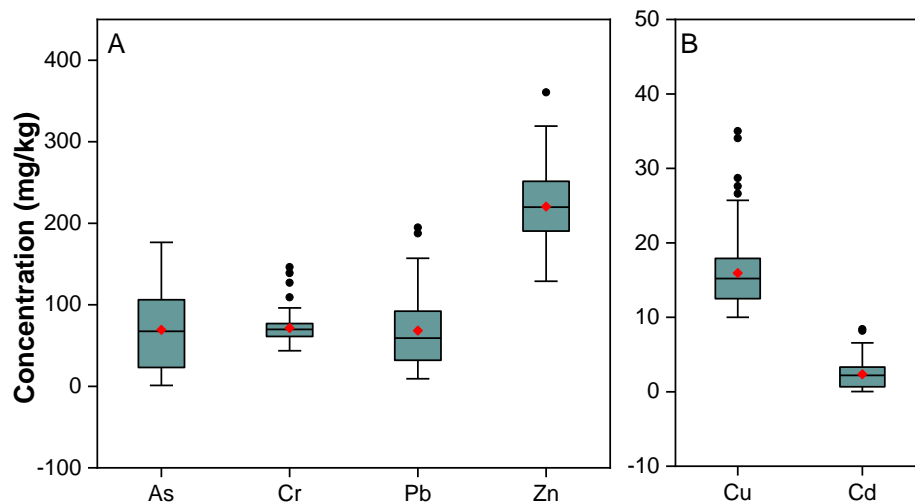

**Figure S1.** Trace-element concentrations in topsoil samples of Huinong District. The black horizontal line represents the median, and the red filled diamond represents the mean. The boxes represent the 25th-75th percentiles, and the whiskers outside the boxes represent the 10th-90th percentiles. The black filled circle beyond the whiskers represents an outlier with a value of  $>1.5$ - $3.0$  times of the box lengths.

**Table S1.** Best-fitted semivariogram models and the parameters of soil trace elements in Huinong District

| Element | Model       | $C_0$   | $C_0+C$ | $A_0$ (km) | $C_0/(C_0+C)$ | $R^2$ |
|---------|-------------|---------|---------|------------|---------------|-------|
| As      | Exponential | 39.5    | 109.14  | 23.04      | 0.362         | 0.923 |
| Cd      | Exponential | 0.658   | 1.942   | 15.26      | 0.339         | 0.933 |
| Cr      | Spherical   | 0.017   | 0.045   | 15.33      | 0.378         | 0.833 |
| Cu      | Exponential | 0.00011 | 0.00024 | 7.41       | 0.471         | 0.921 |
| Pb      | Exponential | 0.825   | 3.047   | 15.61      | 0.271         | 0.917 |
| Zn      | Exponential | 128.2   | 256.5   | 10.74      | 0.500         | 0.754 |

$C_0$ , nugget variance, and  $C_0+C$ , sill variance.
